1 **Bi-clustering based biological and clinical characterization of colorectal cancer in**  
2 **complementary to CMS classification**

3

4 Sha Cao<sup>1,2\*</sup>, Wennan Chang<sup>1,4</sup>, Changlin Wan<sup>1,4</sup>, Yong Zang<sup>1,2</sup>, Jing Zhao<sup>5</sup>, Jian Chen<sup>6</sup>, Bo Li<sup>7</sup>,  
5 Qin Ma<sup>5\*</sup>, Chi Zhang<sup>1,3\*</sup>

6

7 <sup>1</sup>Center for Computational Biology and Bioinformatics, <sup>2</sup>Department of Biostatistics,  
8 <sup>3</sup>Department of Medical and Molecular Genetics, Indiana University, School of Medicine,  
9 Indianapolis, IN,46202, USA.

10 <sup>4</sup>Department of Electronic Computer Engineering, Purdue University

11 <sup>5</sup>Department of Biomedical Informatics, College of Medicine, the Ohio State University,  
12 Columbus, OH, 43210

13 <sup>6</sup>Shanghai pulmonary hospital, Shanghai, China, 200082

14 <sup>7</sup>School of Economics, Peking University, Beijing, China, 100871

15 \*To whom correspondence should be addressed. +1 317-278-9625; Email: [czhang87@iu.edu](mailto:czhang87@iu.edu).

16 Correspondence is also addressed to Sha Cao: [shcao@iu.edu](mailto:shcao@iu.edu) and Qin Ma:  
17 [maqin2001@gmail.com](mailto:maqin2001@gmail.com).

18

19 **ABSTRACT**

20 In light of the marked differences in the intrinsic biological underpinnings and prognostic  
21 outcomes among different subtypes, Consensus Molecular Subtype (CMS) classification  
22 provides a new taxonomy of colorectal cancer (CRC) solely based on transcriptomics data  
23 and has been accepted as a standard rule for CRC stratification. Even though CMS was built  
24 on highly cancer relevant features, it suffers from limitations in capturing the promiscuous  
25 mechanisms in a clinical setting. There are at least two facts about using transcriptomic data for  
26 prognosis prediction: the engagement of genes or pathways that execute the clinical response  
27 pathway are highly dynamic and interactive with others; and a predefined patient stratification  
28 not only largely decrease the statistical analysis power, but also excludes the fact that clusters of  
29 patients that confer similar clinical outcomes may or may not overlap with a pre-defined  
30 subgrouping. To enable a flexible and prospective stratified exploration, we here present a  
31 novel computational framework based on bi-clustering aiming to identify gene regulatory  
32 mechanisms associated with various biological, clinical and drug-resistance features, with full  
33 recognition of the transiency of transcriptional regulation and complicacies of patients'  
34 subgrouping with regards to different biological and clinical settings. Our analysis on multiple  
35 large scale CRC transcriptomics data sets using a bi-clustering based formulation suggests  
36 that the detected local low rank modules can not only generate new biological understanding  
37 coherent to CMS stratification, but also identify predictive markers for prognosis that are  
38 general to CRC or CMS dependent, as well as novel alternative drug resistance mechanisms.  
39 Our key results include: (1) a comprehensive annotation of the local low rank module  
40 landscape of CRC; (2) a mechanistic relationship between different clinical subtypes and  
41 outcomes, as well as their characteristic biological underpinnings, visible through a novel  
42 consensus map; and (3) a few (novel) resistance mechanisms of Oxaliplatin, 5-Fluorouracil,  
43 and the FOLFOX therapy are revealed, some of which are validated on independent datasets.

44

## 45 INTRODUCTION

46 Colorectal cancer is the fourth most frequent cancer in the United States, which accounts for  
47 more than 8% of adult cancer incidence and 8% cancer deaths in 2018 (1). Epidemiology data  
48 suggests the average five-year survival rate of CRC is 64.9%, while more than 80% of  
49 patients die from the disease in five years in the case of metastasis (2, 3). Amongst all,  
50 intra-tumor heterogeneity could account for a significant part of poor treatment response.  
51 CRC is one of the cancer types with most clearly delineated heterogeneity, a few molecular  
52 subtyping methods have been developed, with the goal that it will facilitate the translation of  
53 molecular subtypes into the clinic (4-12). Among these, the Consensus Molecular Subtype  
54 (CMS) classification has been accepted as a standard practice for colorectal cancer (CRC)  
55 stratification (4, 5). CMS classification was derived from a cohort of 18 independent gene  
56 expression data sets with 4,151 samples of CRC, and it has stratified more than 85% of these  
57 CRC samples into four classes with distinct molecular features and prognoses (4). However,  
58 to the best of our knowledge, it remains largely undiscovered regarding the CMS class  
59 specific prognosis and predictive gene markers and relevant biological underpinnings, and  
60 further class based targeted interventions (4). A major challenge for identification of disease  
61 subtype specific biomarkers is that the statistical power will be largely reduced once the  
62 analysis is restricted to a pre-defined stratification. This preprocessing is only meaningful  
63 when the stratification perfectly aligns with the diversity among samples in response to the  
64 prospective clinical outcome. Otherwise, the pre-stratification would severely limit our power  
65 in identifying novel alternative mechanisms underlying the clinical outcomes. These largely  
66 undermine the practicality of the CMS classification, and limited its capacity for clinical  
67 translation.

68  
69 It is imperative to develop a framework that enables us to study the possible alternative  
70 regulatory mechanisms in cancer in recognition of the patients' heterogeneity. We utilized a  
71 non-parametric approach to identify gene expression modules pertinent to sub-populations,  
72 namely, bi-clustering. Bi-clustering analysis is a technique to identify gene co-expression  
73 structures specific to certain and sometimes to-be-identified subsets of samples (13, 14). The  
74 algorithm outputs data blocks, each containing subset of samples and features in a sub-matrix  
75 format, called bi-clusters (BC). We have recently released a new bi-clustering R package  
76 QUBIC-R, which enables identification of bi-clusters (BCs) in whole-genome level  
77 transcriptomics data set and has been shown to have competitive performance compared with  
78 others (15-17). We investigated the identified BCs from a large collection of gene expression  
79 data of CRC to: (1) identify potential gene modules specific to a subset of CRC samples; (2)  
80 provide a mechanistic interpretation of the CRC subtypes, in retrospective of CMS in  
81 particular; and (3) identify prognosis markers and alternative drug resistance mechanisms  
82 specific to different disease subtypes. Under the bi-clustering framework, where there is no  
83 need of pre-defined stratification, we have the power to analyze the data as an intact entity.  
84 Each BC potentially contains signature and coherent gene modules existent in a subgroup of  
85 patients, that reflects the heterogeneous gene expression patterns between samples within and  
86 out of the BC. The gene subsets may enrich certain biological pathways that could lead to  
87 substantially deeper biological understanding for molecular stratification of CRC. More  
88 importantly, any existing sub-grouping methods, such as CMS, could be studied and

89 integrated with the produced BCs retrospectively.

90

91 Thus, we believe our computational framework based on bi-clustering provides a powerful  
92 tool for systematic interrogation of the disease in different clinical settings without  
93 compromising the analysis power. The analysis fully recognizes the large heterogeneity  
94 within CRC patients, some of which may be strongly associated with existing CRC  
95 sub-classes defined by various clinical and genomic features, while the rest will provide novel  
96 alternative ways for us to better understand the disease. Our key results include: (1) a  
97 comprehensive annotation of the local low rank module landscape of CRC; (2) a novel  
98 consensus map demonstrates that CMS IV seem to resemble a mixture of CMS I-III with high  
99 stromal infiltration, while CMS I-III also show characteristics of other classes; (3) disease  
100 progression free survival of CRC are largely determined by micro-environmental alterations  
101 while the overall survival is more associated with the level of stromal infiltration in a CMS  
102 dependent manner; and (4) a few (novel) resistance mechanisms of Oxaliplatin,  
103 5-Fluorouracil, and the FOLFOX therapy are revealed, some of which are validated on  
104 independent datasets.

105

## 106 **RESULTS**

107 In this study, we conducted a bi-clustering analysis in multiple large CRC data sets aiming to:  
108 (1) generate a comprehensive annotation for the landscape of coherent co-expression modules  
109 specific to different subsets of samples; (2) identify CMS class dependent BCs and annotate  
110 biological mechanisms of the BCs and CMS class, (3) identify prognosis predictive BC that  
111 are CMS class dependent/independent; (4) identify alternative drug resistance mechanisms.  
112 By applying our in-house algorithm QUBIC-R on eight colon cancer transcriptomics data sets  
113 with 1,440 samples, we have identified ~4,000 significant BCs on average in each data set  
114 (Table 1). Each of the BC is further annotated by its statistical significance, the pathways  
115 enriched by its genes, and the associations of its samples with CMS class, clinical features,  
116 and patients' survival.

117

### 118 *Analysis Pipeline and Statistical Consideration*

119 Figure 1A shows the analysis pipeline of this study. Gene expression profile of each data set is  
120 first discretized to a binary matrix in preparation for the bi-clustering analysis. Figure 1B  
121 details the bi-clustering analysis procedure. For each gene and an integer  $K$ , expression  
122 profile of the gene was non-parametrically discretized to generate  $K$  binary vectors, where 1s  
123 represent those samples having the gene's expression in the  $\frac{i-1}{K}$  to  $\frac{i}{K}$  quantile in the  $i$ th  
124 vector,  $i=1, \dots, K$ . Otherwise, the vectors have zero values. In this way, the original  $m \times n$   
125 gene expression matrix with  $m$  genes and  $n$  samples is expanded to a  $Km \times n$  binary matrix,  
126 as shown in Figure 1B and detailed in Methods section. Then, submatrices enriched by 1s in  
127 the discretized matrix are identified as BCs heuristically. Obviously, small  $K$  would blur the  
128 variability of gene expression across samples, and large  $K$  would severely undercut the power  
129 of bi-clustering and result in small "narrow" bi-clusters. We also noticed that the proportion of  
130 the largest subtype in CRC is about 1/3, and after testing  $K=2, 3, 4, \text{ and } 5$ , we found that the  
131 discretization with  $K=3$  results in largest number of significant associations between BCs and

132 biological and clinical features (see details in Methods and Supplementary Figure S1).  
133 Considering these,  $K=3$  is selected for all future analysis. Each identified BC consists of a  
134 subset of samples and a group of genes, in which the genes are consistently expressed highly,  
135 moderately, or lowly over the subset of the samples, forming a tight rank-1 co-expression  
136 module specific to these samples. We utilized a rigorous assessment method for the statistical  
137 significance test of the BC's (details in Methods section), and those significant BCs are  
138 further examined to see whether genes in a BC enrich a certain pathway or gene set, and  
139 samples in a BC significantly over-represent a certain phenotype. The analysis pipeline is  
140 implemented with our newest QUBIC-R package, which was recently optimized for  
141 large-scale matrices (15).

142

143 Features/outcomes that are of particular interests in this study include: 29 clinical  
144 features/outcomes in supplementary Table 1; 73 cancer-associated gene mutations  
145 (supplementary Table 1); and treatment responses to three chemo therapeutic drugs namely  
146 5-Fluorouracil, Oxaliplatin, and the combination of 5-Fluorouracil, Oxaliplatin and  
147 Leucovorin. Functional annotation of the BCs are conducted against 1329 pathways and gene  
148 sets in Msigdb (18). The analysis was applied to transcriptomic data of 1,440 patient-derived  
149 CRC tissue samples including the TCGA COAD RNA-Seq data set, as well as seven  
150 microarray data sets (GSE14333, GSE17536, GSE29621, GSE33113, GSE37892,  
151 GSE383832 and GSE39582) measured by Affymetrix UA133 plus 2.0 array platform. (See  
152 detailed data information in Method). The computational pipeline and key statistics of this  
153 work is provided in GitHub via <https://github.com/changwn/BC-CRC>, which can be readily  
154 transplanted for similar analyzes in other disease scenarios. All the supplementary files could  
155 be found in the same GitHub space.

156

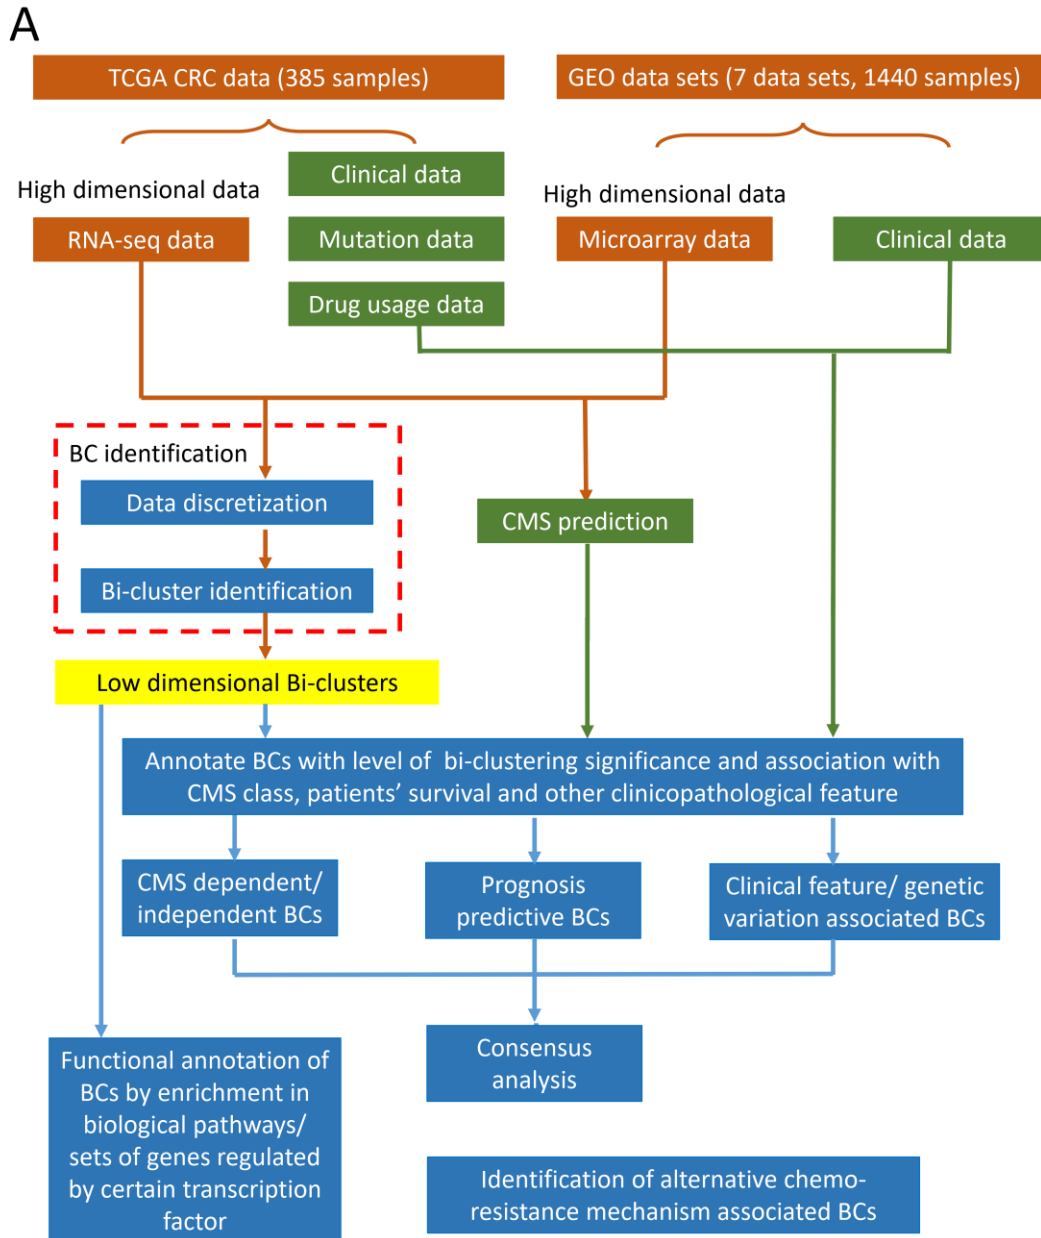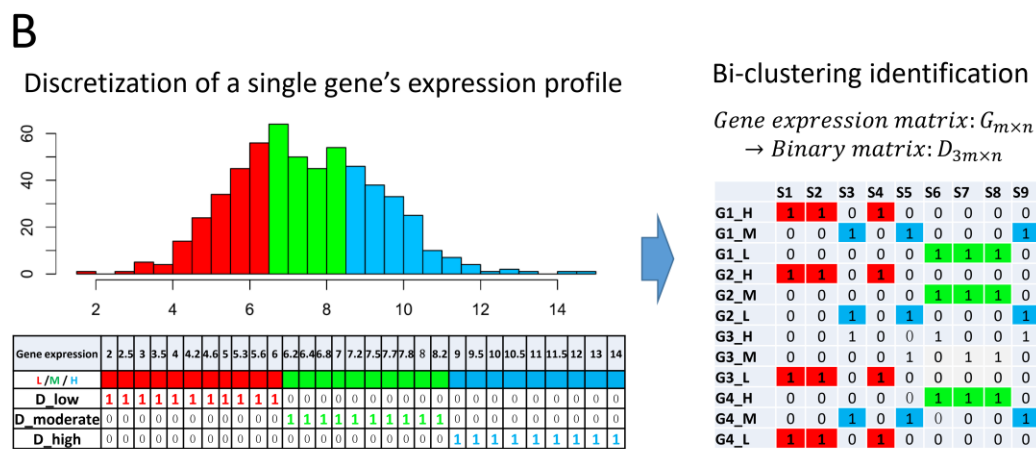

157

158 **Figure 1. (A) General analysis pipeline.** The analysis was conducted to one TCGA RNA-seq  
 159 and seven microarray datasets. BC identification of each high-dimensional data sets is

160 conducted by a discretization followed by a bi-cluster identification step (see details in B).  
161 The identified BCs are further annotated by their associations with biological pathways, CMS  
162 class, and patients clinical and prognostic features. Consensus analysis of the BCs throughout  
163 multiple data sets was further conducted. BCs were further associated with response to  
164 different chemo-drugs for identification of alternative chemo-resistance mechanisms. **(B)**  
165 **Data discretization and bi-clustering procedures.** The histogram on the left illustrates the  
166 distribution of a gene's expression. The gene expression is represented as three 0-1 vectors  
167 (D\_high, D\_moderate and D\_low), corresponding to samples with top (blue), medium (green)  
168 and bottom (red) 1/3 expression level of the gene, respectively. The discretized data are then  
169 merged together that expand an original  $m \times n$  gene expression matrix to a  $3m \times n$  binary  
170 matrix, as shown in the right panel. BCs enriched by 1s are further identified by QUBIC-R.

171

172 *Comprehensive association studies of BCs with functional gene sets and various*  
173 *clinical/biological features*

174 A total of 65,744 BCs are identified in the eight primarily analyzed data sets, and on average,  
175 ~4,000 BCs are found to be significant in each data set (Table 1). Complete gene/sample  
176 information of all the significant BCs are provided for each dataset via R data space through  
177 the GitHub link, with a description listed in Supplementary table 2. For each significant BC,  
178 we comprehensively investigated whether: (1) genes in the BC significantly enrich biological  
179 pathways or gene sets ( $p < 1e-6$ ); (2) samples in the BC are significantly associated with CMS  
180 class ( $p < 0.005$ ); (3) samples in the BC are significantly associated with clinical features such  
181 as age, gender, races and pathological stages ( $p < 0.005$ ); (4) samples in the BC are  
182 significantly associated with prognostic outcomes, namely patients' overall and disease free  
183 survival ( $p < 0.005$ ); (5) samples in the BC are significantly associated with genomic mutation  
184 profiles ( $p < 0.005$ ); and (6) samples in the BC are significantly associated with the response to  
185 three selected chemo-drugs ( $p < 0.005$ ). Figure 2A shows the proportion of BCs with  
186 significant annotations of the first four types of associations in the eight data sets. On average,  
187 71.79% (22,981/32,008) of the significant BCs can be significantly annotated by at least one  
188 of the four associations in the eight data sets, with detailed numbers listed in Table 1.  
189 Complete annotation of the BCs is also provided through GitHub and described in  
190 Supplementary Table 2. Note that (5) and (6) are specific to TCGA-COAD dataset. We will  
191 discuss (6) in more details in a separate section. Results for additional clinical features, such  
192 as TNM stages, not present in all datasets, together with (5), are all listed in supplementary  
193 Table 1.

194

195 Table 1. Bi-clustering information of the eight data sets

| <b>Data ID</b>   | <b>#Identified BCs</b> | <b>#Significant BCs</b> | <b>#Pathway enriched BCs</b> | <b>#CMS BCs</b> | <b>#DFS and OS BCs</b> | <b>#Other clinically associated BCs</b> |
|------------------|------------------------|-------------------------|------------------------------|-----------------|------------------------|-----------------------------------------|
| <b>GSE14333</b>  | 9631                   | 6547                    | 2597(39.7%)                  | 2512(38.4%)     | 448(6.8%)              | 452(6.9%)                               |
| <b>GSE17536</b>  | 11255                  | 4806                    | 2187(45.5%)                  | 1425(29.7%)     | 284(5.9%)              | 63(1.3%)                                |
| <b>GSE29621</b>  | 8167                   | 1758                    | 582(33.1%)                   | 289(16.4%)      | 73(4.2%)               | 56(3.2%)                                |
| <b>GSE33113</b>  | 9238                   | 2836                    | 795(28%)                     | 958(33.8%)      | 136(4.8%)              | 3(0.1%)                                 |
| <b>GSE37892</b>  | 10644                  | 4452                    | 1600(35.9%)                  | 1202(27%)       | 130(2.9%)              | 101(2.3%)                               |
| <b>GSE38832</b>  | 5845                   | 4319                    | 2603(60.3%)                  | 1705(39.5%)     | 335(7.8%)              | 0(0%)                                   |
| <b>GSE39582</b>  | 8267                   | 4658                    | 1200(25.8%)                  | 2894(62.1%)     | 1068(22.9%)            | 1847(39.7%)                             |
| <b>TCGA_COAD</b> | 2697                   | 2632                    | 1077(40.9%)                  | 743(28.2%)      | 183(7%)                | 954(36.2%)                              |

196

197 Figure 2B shows the cumulative ratio of the BCs that show significant annotations for at least  
 198 once, among pathway, CMS class, patients' prognosis and other clinical outcomes (y-axis),  
 199 wherein the BCs are ordered by their bi-clustering significance levels on a descending order  
 200 (x-axis). On average, more than 80.7% of the top 20% significant BCs and 66.4% of all  
 201 significant BCs could be significantly annotated in the eight data sets, indicating more  
 202 significant BCs tend to be more biologically/clinically relevant. This shows that our  
 203 bi-clustering algorithm could indeed identify local modules that bear biological/clinical  
 204 significance. In general, for the most significant BCs ( $p < 1e-200$ ), their genes tend to have  
 205 strong associations to biological pathways, including cell cycle, cell proliferation, cell death,  
 206 biosynthesis and metabolism of nucleic acid, mRNA and protein, cytoskeleton synthesis,  
 207 protein phosphorylation, cell membrane, cell adhesion, and immune response and chemokine  
 208 activity pathways (Figure 3). However, their samples don't seem to be significantly associated  
 209 with existing clinical features or CMS classes, meaning that these BCs may be general to the  
 210 large population. In the next level ( $1e-200 < p < 1e-50$ ), the BCs associated with CMS class or  
 211 other clinical features are with relatively smaller sizes and less significance compared to the  
 212 first level, and these BCs enrich a different group of biological pathways including immune  
 213 response, extracellular matrix, cytoplasmic part, O linked and N linked protein amino acid  
 214 glycosylation, cell membrane, protein modification, lipoprotein biosynthesis and lipid  
 215 metabolism, ABC transporter, steroid hormone metabolism and signaling pathway.

216

217 On average, we have seen that 44.7% of the DFS associated and 33.9% of the OS associated  
 218 BCs are also associated with at least one CMS class while the rest are CMS classification  
 219 independent, as shown in Figure 2C, suggesting possible CMS class specific prognosis  
 220 markers. Most of the CMS dependent DFS associated BCs are associated with CMS class I  
 221 and IV while some OS associated BCs were found to be independent of the CMS classes.

222

223 The ratio of BCs that are significantly associated with biological pathways (left), CMS classes  
 224 (middle) and patient's DFS and OS (right) versus the quantiles of the bi-clustering  
 225 significance are shown in Figure 2D. Again, we observe that the more significant BCs tend

226 to significantly enrich more biological pathways. Similar patterns are not identified for CMS  
 227 class in all datasets. This coincides with our initial motivation that: patients stratifications  
 228 should not be fixed for all the clinical/biological outcomes, as each of them may have  
 229 different levels of diversity, and even the most cancer relevant stratification, such as CMS,  
 230 may not perfectly align with the true subtypes with regard to a certain prospective outcome.  
 231 Interestingly, BCs associated with patients' survival, including DFS and OS, fall into two  
 232 groups: one group accounts for ~30% of the DFS/OS associated BCs with higher significance  
 233 ( $p \sim 1e-200 < p < 1e-80$ ), which shows an overall significant association with DFS/OS regardless  
 234 of CMS. BCs in this group enrich a diverse set of signaling transduction pathways including  
 235 NOTCH, RHO factor, TRKA receptor, EGF, RAS, cell surface/ kinase receptor, glycoprotein,  
 236 chemokine and other immune response related signaling pathways. The other group is formed  
 237 by BCs with relatively lower significance ( $p \sim 1e-80 < p < 1e-20$ ), and their associations with  
 238 DFS/OS tend to exhibit CMS dependency. This means that the DFS/OS associations are  
 239 diverse among CMS classifications. Biological characteristics of these BCs are discussed in  
 240 the following sections.

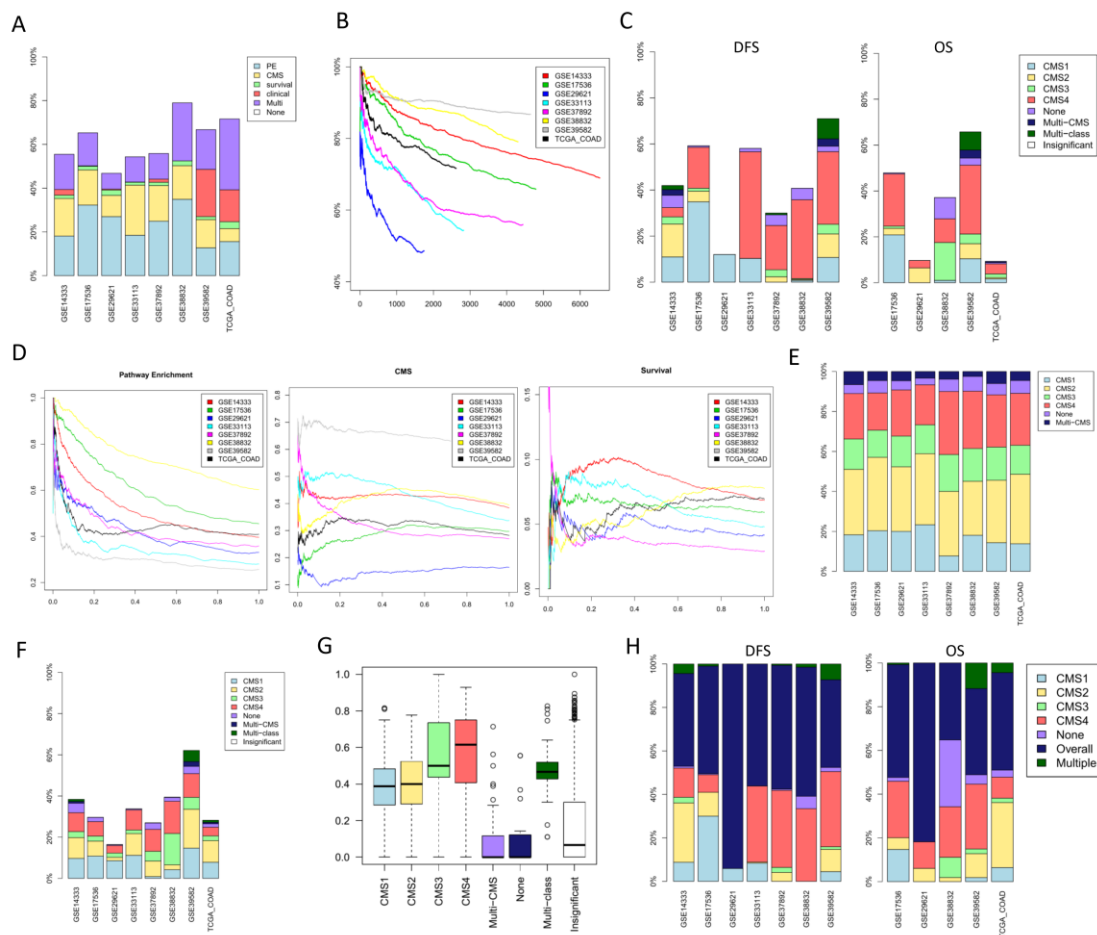

241  
 242 **Figure 2. Statistics of the BC landscape in the eight data sets.** (A) Proportions of the BCs  
 243 (y-axis) associated with biological pathways (PE), CMS, patients' DFS/OS survival, clinical  
 244 features, and their combinations (Multi) in each data set (x-axis). (B) Cumulative rates of BCs  
 245 (y-axis) with at least one of the four types of annotations versus ranks of BCs (x-axis). The  
 246 BCs are ordered by their bi-clustering significance in a descending manner in each data set.  
 247 (C) Proportions of the BCs (y-axis) that are associated with certain CMS classes among the



248 BCs with significant associations to patients' survival, including DFS and OS, in each dataset  
249 (x-axis). (D) Cumulative rates of BCs (y-axis) significantly associated with biological  
250 pathways (left), CMS classes (middle) and patient's DFS and OS (right) versus the quantiles  
251 of the bi-clustering significance (x-axis). For example, a "0.2" quantile means the top 20%  
252 significant BCs. (E) Proportions of the BCs (y-axis) with significant associations to different  
253 CMS classes in each data set (x-axis). (F) Among the BCs with significant associations to  
254 patients' survival, the proportions of the BCs (y-axis) associated with CMS types in each data  
255 set (x-axis). (G) For BCs associated with different CMS class, the average overlapping rates  
256 (y-axis) between the genes in the BC and CMS marker genes in each dataset (x-axis). (H)  
257 Among all the DFS/OS associated BCs, the proportion of the BCs (y-axis) that significantly  
258 over-represent a (sub)sample class in each dataset (x-axis). In (C), (E) and (F): None: CMS  
259 unclassified samples; Multi-CMS: a class of samples falling into more than one CMS classes;  
260 Multi-class: a class of BCs significantly associated with more than one CMS classes. In (H):  
261 None: CMS unclassified samples; overall: the BCs associated with survival throughout all  
262 patients, but not with a particular CMS class; Multiple: the BCs associated with patients'  
263 survival specific to the patients of more than CMS classes.

264

#### 265 *A consensus functional annotation of the bi-cluster landscape*

266 Our analysis has revealed that BCs associated with different clinical features enrich distinct  
267 sets of pathways, suggesting that different biological/clinical features are characterized by  
268 different responsive mechanisms. Among these BCs, a notable portion exhibit a  
269 CMS-dependent manner. To help us better understand the functional annotations of these BCs,  
270 and the underlying sub-groupings they may represent, we summarized the biological  
271 pathways that are consistently enriched by the BCs across all datasets, that do show  
272 significant signs of clinical associations, including CMS, OS, DFS and their intersections. We  
273 call this a consensus functional annotation of the BC landscape in CRC. As shown in Figure 3,  
274 49 pathways/gene sets in total are examined, and here is how these pathways were selected.  
275 We first placed the BCs of each dataset into 18 pools shown on the top of the figure: BCs of  
276 top bi-clustering significance, over-representing CMS I, II, III, IV, unclassified, associated  
277 with DFS in general, associated with DFS and CMS I, II, III, IV, unclassified, associated with  
278 OS in general, associated with OS and CMS I, II, III, IV, unclassified, for each dataset. For  
279 each BC in each pool of each dataset, pathway/gene set enrichment was performed, and  
280 within each pool, the pathways that are enriched most consistently across all datasets are  
281 selected, as shown on the left of the figure. This results in a subset of pathways/gene sets that  
282 are consistently enriched by BCs that are shown to have one of the 18 characteristics.

283

284 To have an even finer view, we drew pie graphs with sectors of varied radius and shade to  
285 provide a more quantitative measure of the intricate relationships among pathways/gene sets  
286 and different phenotypes. Each pie graph consists of up to eight sectors, one sector for one  
287 dataset, depending on whether DFS or OS data is available for the dataset. The radius of the  
288 sector shows the proportion of genes in the pathway that are hit by the BC in the dataset, and  
289 shade of the sector shows the significance of the enrichment test for the genes in the BC  
290 against the pathway. The larger the radius, the more the genes are being hit the BC; the darker  
291 the shade, the more significant the enrichment is. Note that for each pool, only the BC with

292 the highest enrichment significance of the pathway is selected, in drawing the radius and  
293 shade of the sectors. Details of the color parameters are shown in Supplementary Note.

294

295 Moreover, to exhibit how similar the 18 different pools or phenotypes are, we regrouped the  
296 47 pathways, and found that they in fact fall into 10 categories: BCs of top bi-clustering  
297 significance, over-representing CMS I, II, III, IV, unclassified, associated with DFS,  
298 associated with DFS in a CMS dependent manner, associated with OS, associated with OS in  
299 a CMS dependent manner, as shown on the right of the figure. The re-grouping was done in  
300 such a way that each pathway was given a score based on the average radius and shade of the  
301 pie graph over all datasets, namely, the hitting frequency and the enrichment significance  
302 value, and was then assigned to one of the 10 categories with a highest score. The 10  
303 categories we used here are very similar to the 18 characteristics or pools we presented earlier,  
304 only in a coarser way.

305

306 This consensus map is a novel visualization that greatly helps us visualize for samples in  
307 different cancer subtypes and key clinical outcomes, how they express distinct functional  
308 pathways, and they relate to each other and to what extent they resemble, and the resolution is  
309 for each pathway and each dataset. As shown in Figure 3, for samples in different CMS  
310 classes, they are characterized by different pathways/gene sets: CMS I by ER stress, wound  
311 healing, macrophage and B cell activation, WNT signaling and glucose metabolisms; CMS II  
312 by hormone receptor, TP53 and IL2 signaling; CMS III by cell proliferation and cell  
313 matrix-adhesion; CMS IV by T cell activation and Cyclin dependent kinase; and unclassified  
314 samples by notch, MYC and TGF-beta signaling pathways. Moreover, different CMS classes  
315 don't seem to be completely isolated. BCs associated with CMS I are also enriched by  
316 immune signaling pathways including IL-3, -5, -6, -12, -27, STAT, and interferon gamma  
317 signaling pathways, as well as nucleotide biosynthesis, WNT signaling, lipid metabolism, and  
318 glycolysis pathways, which are markers of CMS II and III classes (4). Considering that CMS  
319 I is a subtype with high MSI and strong immune cell activation (4), our observation clearly  
320 suggests that there are distinct subgroups inside CMS I class with different immune activation  
321 status that display CMS II-like characteristics with high expression of epithelial and WNT  
322 signaling markers and CMS III-like characteristics of metabolism dysregulations. More  
323 intriguingly, the BCs associated with CMS class IV fall into two categories: one enriched by  
324 integrin binding, epithelial cell cycle, cell death, cell-cell and cell-matrix adhesions pathways,  
325 while the other enriched by immune response, MYC and WNT signaling, and metabolism  
326 pathways. The first category show expression of cancer and stromal cell marker genes,  
327 suggesting different levels of stromal cell infiltration in CMS IV class samples. In contrast,  
328 the second category enriches marker genes of CMS class I-III, suggesting there are subgroups  
329 of CMS IV samples with distinct characteristics of CMS class I, II or III. CMS IV is a subtype  
330 with high stromal infiltration and angiogenesis (4). Our previous study has identified a  
331 dynamic population of mesenchymal-like cells with similar markers as CMS IV (19). With  
332 these observations, we suspect that CMS IV is a combination of CMS I-III but with higher  
333 proportion of stromal cells, hence higher expression of mesenchymal cell markers and lower  
334 rate of somatic mutations. However, it is noteworthy that the CMS IV cancers have generally  
335 poorer prognosis comparing to CMS I-III, indicating the level of stromal infiltration may

336 serve as an important prognosis marker for all the CMS classes. We have also seen that a  
337 number of BCs associated with CMS II and CMS III are enriched by marker genes of other  
338 CMS classes. The BCs associated with the unclassified samples are enriched by signaling  
339 pathways of MAPK, P38, GPCR, NOTCH, TGF-beta, ARF6 and other kinase receptors and  
340 pathways responsive to micro-environment stresses including ER stress, oxidative stress,  
341 dysregulated immune activation and extracellular matrix malfunction. We suspect that these  
342 samples are with activation of specific signaling pathways or with distinct micro-environment  
343 stresses that cause varied gene expressions, hence cannot be classified by the distance based  
344 CMS classifier. A consensus functional annotation of the BCs enriching different CMS classes  
345 are given in Supplementary Table 3.

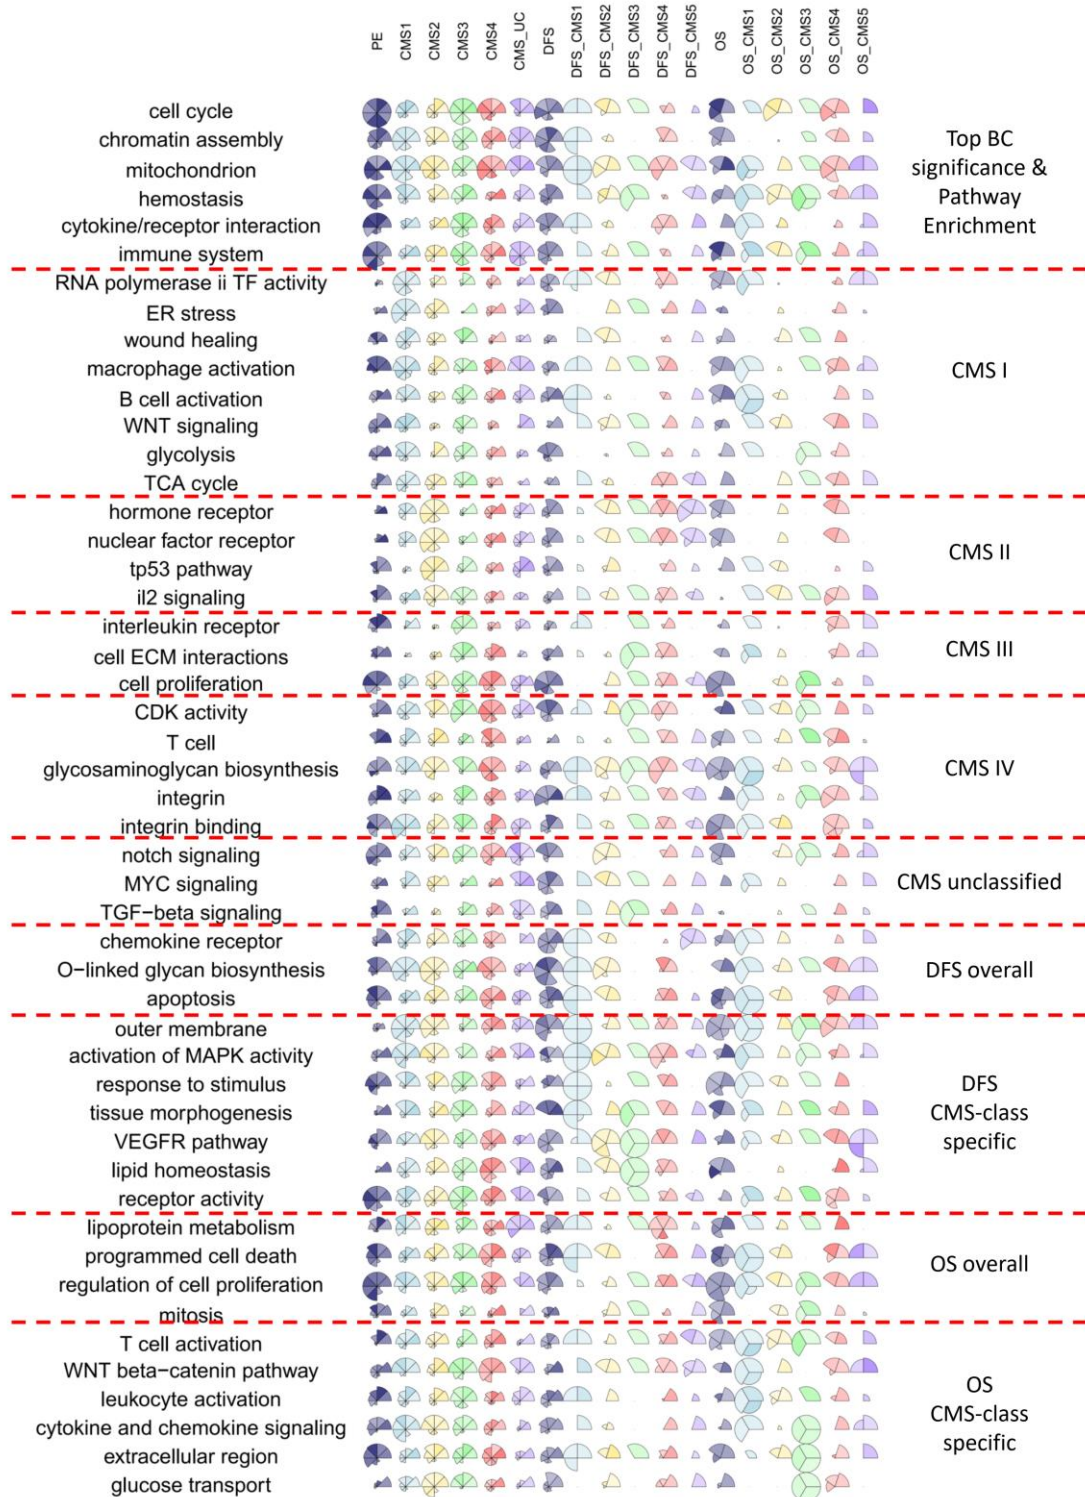

346

347 **Figure 3. A consensus map representing the intricate relationships between key**  
 348 **pathways and clinical features, as well as similarities among different clinical features.**

349 The top of the figure shows 18 different pools that the BCs in each dataset are placed in, and  
 350 the left of the figure shows the pathways that are consistently enriched by the BCs in the pool.

351 Each pie graph consists of up to eight sectors, one sector for one dataset, depending on

352 whether DFS or OS data is available for the dataset. For each of the 18 pools in each dataset,

353 only the BC with the highest enrichment significance of the pathway is selected, and the level

354 of enrichment is presented by the radius and shade of the sectors: the larger the radius, the  
355 more the genes in the corresponding pathway are being hit the BC; the darker the shade, the  
356 more significant the enrichment is using genes in the BC for the pathway. On the right, the  
357 pathways are re-grouped into 10 categories, so that the pathway is assigned to the group that it  
358 most significantly represents.

359

#### 360 *Heterogeneous prognosis of CRC in retrospective of CMS*

361 For all the eight data sets, on average 19.2% (12,641/65,744) of the BCs are significantly  
362 associated ( $p < 0.005$ ) with at least one of the CMS classes, and among these, the proportion of  
363 BCs associated with each class is shown in Figure 2E. On average, BCs associated with at  
364 least one CMS class only cover 23.6%, 15.6%, 30.1% and 24.1% of the samples for CMS I-IV,  
365 respectively (shown in Supplementary Figure 2), suggesting that most of the underlying  
366 cancer sub-groups may not align perfectly well with the CMS classification. Comparing the  
367 proportion of samples in the BCs falling under different CMS class (shown in Figure 2F),  
368 there are relatively more BCs aligning with CMS class I and IV, and unclassified, suggesting  
369 higher variations among the samples within these classes. Of note, BCs associated with the  
370 four CMS classes, especially class III and IV, contain genes that highly overlap with the  
371 putative CMS marker genes; while the CMS marker genes rarely show up in BCs associated  
372 with the unclassified samples, as shown in Figure 2G. This indicates that the genes we  
373 identified in the BCs are indeed coherent with the marker genes of CMS class. Very few BCs  
374 are observed to have associations with the samples of multiple CMS classes.

375

376 Among all the BCs associated with DFS, 42.9% also over-represent certain CMS classes,  
377 while this rate is 49.5% for OS (See Figure 2H), on average. Particularly, 53.1% and 40.4% of  
378 these CMS-specific BCs fall under CMS IV class for DFS and OS respectively, on average.  
379 For DFS, the CMS IV specific BCs enrich the following pathways: glycosaminoglycan  
380 biosynthesis and metabolism, UDP glycosyltransferase, lipid, phospholipid and  
381 glycosphingolipid metabolism, mRNA splicing, and steroid hormone metabolism; while for  
382 OS, the pathways are : immune signaling, WNT and MYC signaling, VEGF signaling, tumor  
383 necrosis, notch signaling, cell proliferation and integrin pathways. This observation suggests  
384 that the extracellular matrix, glycosaminoglycan metabolism, lipid metabolism are prognostic  
385 markers for DFS if the patients are diagnosed with CMS class IV, while for OS, the markers  
386 are related to stromal infiltration. Similarly, we also observed a large proportion of CMS class  
387 I (19.1%) and CMS II specific (17.7%) BCs for DFS associated BCs, and CMS II specific  
388 (25.1%) BCs for OS associated BCs. The CMS I specific DFS associated BCs enrich  
389 chemokine signaling, integrin signaling, chondroitin sulfate and sulfur metabolism, O linked  
390 glycosylation, and other immune and inflammation related pathways; CMS II specific DFS  
391 associated BCs enrich hypoxia response, O linked glycosylation, PI3K signaling, apoptosis,  
392 and immune response pathways; and CMS II specific OS associated BCs enrich cell cycle,  
393 nucleotide excision repair, and MYC signaling pathways.

394

395 It is noteworthy that the T cell and leukocyte activation is a significant OS dependent feature  
396 for CMS1 patients but not for other CMS classes (Figure 3). CMS I has high MSI, mutation  
397 load and immune response, associated with higher abundance of neo-antigen and better

398 response to immune-therapy (4). A high (CD8+) T-cell infiltration and activation in this group  
399 contributes to higher anti-tumor immune population. For the rest of the classes, CMS III  
400 generally has low infiltration level of T cells, and we suspect the even though cancers of CMS  
401 II and IV have high T cell infiltration, but these T cell are either exhausted or non-cancer  
402 associated. Hence the tissue level T cell gene expression do not show associations with the  
403 patients' prognosis in any of CMS class II-IV. Such observations suggest the divergence of  
404 prognosis associated mechanisms among different CMS groups.

405

406 In addition to these, we constructed multi-variant Cox regression model to explain the  
407 patients' prognosis using selected prognosis associated BCs and CMS class. (see Methods).  
408 Our analysis suggested that the BCs forming independent predictive markers for DFS enrich  
409 pathways including chemokine receptor, O-linked glycan biosynthesis, apoptosis,  
410 mitochondria, cell membrane, MAPK activity, tissue morphogenesis, VEGFR pathway, lipid  
411 homeostasis and cell surface receptor activity; while for OS, the BCs enrich cell death, cell  
412 proliferation, mitosis, glycosaminoglycan synthesis, integrin (possibly suggests stromal  
413 infiltration level), T cell activation, WNT beta-catenin signaling, leukocyte activation,  
414 extracellular region and glucose transport and VEGFR pathway.

415

416 In summary, our analysis reveals distinct prognosis markers of different prognosis type and  
417 CMS class. Specifically, the DFS markers are largely enriched by genes related to  
418 micro-environmental stresses while the OS markers is more determined by the level of  
419 stromal infiltration and immune response.

420

#### 421 *Alternative drug resistance mechanisms of CRC*

422 Chemo-therapy is one of the standard cancer treatment methods that induces cell death of fast  
423 proliferating cancer cells (20). It has been reported that cancer cells could develop resistance  
424 mechanism to chemo-therapy through alterations in pathways including cell proliferation,  
425 apoptosis, DNA damage repairing and stress response through changes in expression levels  
426 and/or mutation status of key genes (21, 22). Our understanding of drug resistance mechanism  
427 is largely complicated by intra-tumor heterogeneity within a tumor tissue and its intricate  
428 micro-environmental stresses. It is noteworthy that multiple alternative resistance  
429 mechanisms may exist among the patients, where each patient's cancer cells acquiring one or  
430 several such mechanisms can suffer from poor prognosis to chemo-therapy. In this study, we  
431 attempt to identify the multiple chemo-resistance mechanisms within a heterogeneous patients  
432 population by our bi-clustering formulation. We hypothesize that the alternative resistance  
433 mechanisms among patients could be reflected by the BCs associated with poor prognosis to a  
434 certain chemo-drug.

435

436 The clinical information in TCGA provides patients' treatment response to three most  
437 prevalent CRC chemo-therapy plans, including 5-Fluorouracil (5-FU), Oxaliplatin (OXA),  
438 and the combination of OXA, 5-FU and Leucovorin (FOLFOX). We selected those BCs  
439 associated with resistances to the three drugs with TCGA expression data. A BC is defined as  
440 associated with resistance of a chemo-drug if the following two conditions are both met: (1)  
441 among drug treated samples, the overall survival of samples in the BC is significantly worse

442 than those not in the BC ( $p < 0.001$ ); and (2) among samples in the BC, the overall survival of  
443 samples that are drug treated is significantly worse than those not treated ( $p < 0.05$ ). Among  
444 the resistance associated BCs, we posit that multiple may correspond to the same resistance  
445 mechanism. In order to identify the most unique set, we incorporated a log-rank test coupled  
446 with agglomerative clustering to cluster the BCs of similar resistance mechanisms into groups,  
447 each of which is linked with one unique drug resistance mechanism (see details in Methods  
448 section).

449

450 To identify resistance mechanism associated BCs, we conducted an agglomerative clustering  
451 and log-rank test based approach to group the BCs that are highly represented by poor  
452 responders. Specifically, we generate agglomerative clustering for all the drug resistance  
453 related BCs where the distance of a pair of BCs is measured by the Jaccard index of the  
454 samples in the two BCs. Two BCs are clustered if at least one of the two sample set  
455 differences between the two BCs are insignificantly associated with drug resistance.  
456 Completed information of BC groups are given in Supplementary Table 4.

457

458 5-FU is one of the most commonly used chemo-drugs in treating CRC (23). We identified 11  
459 BCs associated with 5FU resistance. Agglomerative clustering and stepwise test revealed that  
460 the 11 BCs form four groups, where each group consists of a number of genes tightly  
461 co-expressed, and a number of samples presented with 5FU resistance, as shown in Figure 4A.  
462 The first BC group is highly enriched by the genes involved in known chemo-resistance  
463 related mechanisms, including over expression of CFLAR involved in apoptosis and FAS  
464 signaling; CAPRIN2 related to cell proliferation and cancer multi-drug resistance; DNA  
465 excision repair gene XPA; cell cycle regulating proteins DMTF1 and SYCE2; killer cell  
466 activating receptor associated protein TYROBP; taurine metabolism gene CSAD; RNA  
467 processing proteins RBM6 and CLK1; DNA binding and transcriptional regulatory genes  
468 ZNF638, ZNF169, ZNF26, ZNF333, ZNF493, ZNF234 and ZNF33A; OGT, TAS2R5,  
469 LTB4R2 related to cellular response to chemical stimuli. It is noteworthy that a number of  
470 genes in this panel including CFLAR, CAPRIN2, XPA, TYROBP, CLK1, OGT, and  
471 LTB4R2 have been previously identified to relate to chemo-resistance in other cancer types  
472 (24-29). The second BC group is composed by highly expressed genes including SMAD2,  
473 SMAD4, TCF12, ELP2, ATG2B, PIGN, MBP, NCBP3 and PIK3C3, which enrich pathways  
474 of cell cycle, cell metabolism regulation, TGF-beta signaling, PI3K cascade, autophagy,  
475 immune responses and mRNA production regulation. The third BC group is enriched by a  
476 large number of pseudo genes and the protein coding genes in this group enrich the translation  
477 regulation and viral infection, in which genes TMA7, DEXI and EIF3CL have been  
478 previously reported as related to cisplatin and fluorouracil resistance in bladder and gastric  
479 cancer (30, 31). In addition, the four BCs group are also enriched by two different groups of  
480 ribosome proteins, which are related to translational control and elongation of peptides.

481

482 OXA is a platinum-based antineoplastic chemo-drug used to treat colorectal cancer (23). We  
483 have identified 10 BCs with strong associations to OXA resistance, which were further  
484 clustered into three groups as shown in Figure 4B. The first BC group shows an overlap with  
485 the first group in 5FU resistance, in that the genes are also involved in known

486 chemo-resistance related mechanisms including CFLAR, CAPRIN2, TYROBP, CLK1, OGT  
487 and LTB4R2 as well as SYCE2, RBM6, ZNF638, ZNF169, ZNF26, ZNF333, ZNF493,  
488 ZNF234 and ZNF33A related to cell cycle, mRNA processing and DNA binding. Meanwhile,  
489 this group also contains overly expressed DNA synthesis and cell cycle genes POLA1, CHFR,  
490 and TAF1; mRNA processing gene PCF11; EPHA7 and COL4A3 related to tissue  
491 development; and ITPR2 related to calcium dependent signaling transduction. The second  
492 group also contains CFLAR, CAPRIN2, SYCE2, and LTB4R2 identified in the first group. In  
493 addition, this group also contains cyclin-D binding transcription factor DMTF1;  
494 transcriptional regulation co-factor EP300; GTF2H4 related to RNA polymerase II  
495 transcription initiation; mRNA splicing gene DDX39B; and cell surface channel, transporter  
496 or exchanger genes PKD2, TRAPPC10, SMG1, and TRIO. The third group contains a  
497 number of nuclear ribonucleoproteins and HSPA5, where the latter has been previously  
498 identified as a chemo-resistance biomarker and molecular target in B-lineage acute  
499 lymphoblastic leukemia (32).

500

501 FOLFOX is combinatorial therapy of 5Fu, OXA with Leu--a reduced folic acid based drug  
502 that is used in combination with other chemotherapies to enhance effectiveness or prevent  
503 side effects of the chemo-drugs (23, 33). We have identified eight BCs forming four BC  
504 groups (Figure 4C). The first BC group shows strong overlaps with the first group of 5FU  
505 chemo-resistance, and the first and second group of OXA chemo-resistance, which includes  
506 CFLAR, CAPRIN2, SYCE2, CSAD, MSH5, XPA, OGT, LTB4R2, ZNF234, ZNF169,  
507 ZNF493, ZNF26, and ZNF333. The second group is composed of highly expressed JAK2,  
508 which is involved in multiple cytokine receptor signaling pathways related to immune  
509 response; Rho GTPase Activating Protein DLC1 (tumor suppressor); cell death related genes  
510 NME1, BCL2L15 and RPSS3A; tissue development regulating gene FOXA2; TCA cycle and  
511 respiration electron transport genes ATP5C1 and COX7A2L; and mitochondrial inner  
512 membrane translocase TIMM23. In addition, this group is also highly enriched by overly  
513 expressed ribosome proteins. The third group contains highly expressed CAPRIN2, cell  
514 proliferation regulating gene DMTF1 and mRNA processing proteins DDX39B and GTF2H4.  
515 The fourth group is composed of under expressed microRNA MIR3911 and antisense mRNA  
516 EIF1AX-AS1.

517

518 To validate the drug resistance mechanism we identified using BCs, we collected independent  
519 datasets of drug screening on colon cancer cell line (see methods). Unfortunately, to the best  
520 of our knowledge, 5-FU is the only one drug with a wide spectrum of sensitivity measure on  
521 cell lines among the three. 5-FU screening was performed on 29 and 19 colon cancer cell  
522 lines for two independent datasets (34, 35). In each dataset, we computed the correlations  
523 between the basal level expressions of all the genes and cell's response to 5-FU, measured by  
524 IC50 and GI50 (see Supplementary table 5). Distribution of the correlations for genes in each  
525 BC group was compared with the distribution of the correlation for all genes, which serves as  
526 a random background. Density curves of the correlations of each BC group and the  
527 background are shown in Figure 4D and 4E. We have seen that, comparing with the  
528 background correlation level, genes in BC group 4 show much higher correlations to cells'  
529 resistance to 5-Fu, and BC groups 1-3 also contain a marked portion of genes that are more



530 correlated with 5-Fu resistance than background. This serves as further validation of our  
531 observations of alternative drug resistance mechanisms. Detailed lists of the validation data  
532 are provided in Supplementary Table 5.

533 In summary, for each chemo-drug, we have identified a few resistance mechanisms, some of  
534 which are novel to CRC, and they are presented in the form of BC groups. It is noteworthy  
535 that the genes CFLAR, CAPRIN2, SYCE2, OGT, and LTB4R2 are consistently observed as  
536 resistance associated for all the three drugs. Further investigation of the sample distribution of  
537 the BC groups suggests that the first BC group of 5-Fu, OXA and the second BC group of  
538 FOLFOX highly overlap, which correspond to poor response of 5-Fu and OXA in CMS1  
539 samples and FOLFOX in CMS2 samples (Figure 4F). The second BC cluster of OXA and the  
540 third BC cluster of FOLFOX overlap, which corresponds to poor response in CMS1 samples.  
541 In addition, the 5-Fu BC groups 2, 3 and 4 show that patients of CMS III, CMS III/IV and  
542 CMS II/III are particularly resistant to 5-Fu; OXA BC groups 2 and 3 show that OXA  
543 resistance is in particular obvious in CMS II/III and CMS I/II/III; FOLFOX BC groups 1, 3,  
544 and 4 show that resistance of the drug prevalently happen to patients of CMS II/IV, CMS II  
545 and CMS IV. Interestingly, 5-Fu BC group 1 and FOLFOX BC groups 1 and 4 do not seem to  
546 show chemo-resistance mechanisms specific to any CMS classes. Among the identified BC  
547 groups for each drug type, some of them are enriched by genes involved in chemo-resistance  
548 related biological processes or known chemo-resistance markers. Meanwhile, we have seen in  
549 1-2 BC groups for each drug type there exists novel biomarkers, including overly expressed  
550 ribosome genes and under expressed ncRNAs.

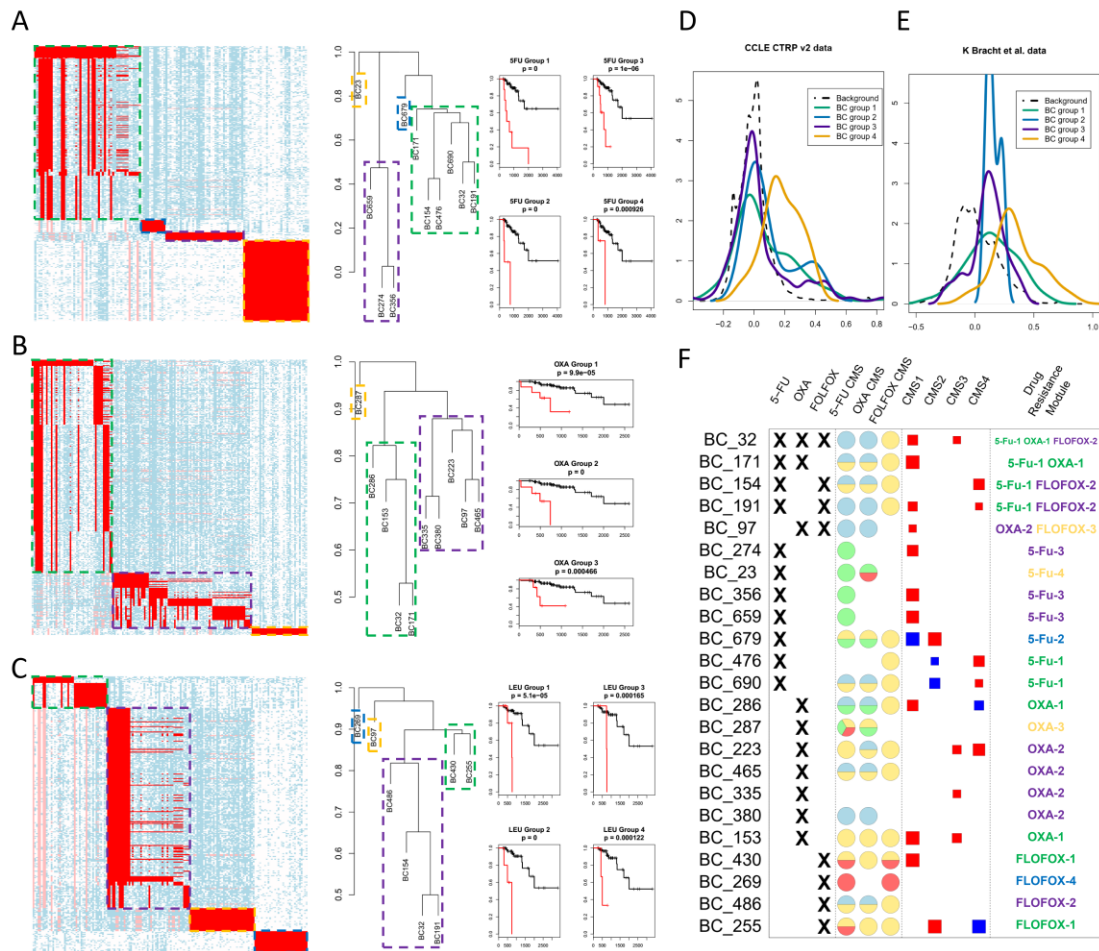

551

552 **Figure 4. Possible alternative chemo-resistance mechanism depicted by BC groups.** (A-C)

553 Discretized gene expression profile of the resistance BC groups for 5FU (A), OXA (B), and

554 FOLFOX (C). For (A-C), in the left-most panels, blue and white in the heatmap represent 1s

555 and 0s in the discretized data matrix, while red represents the matrix element belonging to a

556 certain BC group, framed in green dashed line. In the middle panels, the dendrograms show

557 the results of agglomerative clustering of the resistance associated BCs. Each BC group is

558 framed by a dashed rectangle. In the right-most panels, the survival curves represent for the

559 drug treated patients, the comparison of overall survival of the patients in a BC group (red)

560 with those not (black). (D-E) Distribution of the correlations calculated between expressions

561 of genes in different groups with drug resistance measure IC50, in CTRP v2 dataset (D) and

562 GI50 in K Bracht et al.'s dataset (E). The x-axis represents the correlations and the y-axis

563 represents the density. (F) Relationships between chemo-resistance BCs and different CMS

564 classes. In columns 1-3, a "cross" sign indicates the drugs that samples in the BCs show

565 resistance for; in columns 4-6, larger sizes of the sectors indicate higher significances that the

566 BC's resistance mechanisms is also exhibited in CMS I (blue), II (yellow), III (green), and IV

567 (red); in columns 7-10, larger sizes of the squares indicate higher significances that the BC is

568 positively (blue)/negatively (red) enriched by samples in each CMS class (only p<0.001 are

569 shown); the last column shows for each BC, the type of drug and BC group it is linked to.

570

571 *Bi-clusters associated with mutations*

572 We have also tested the association between BCs and 117 high frequently-mutated and  
573 non-MSI-associated genes in TCGA COAD data. Our analysis identified that 29.1%  
574 (550/1886) of the BCs annotated by the aforementioned four types of associations and 22.5%  
575 (168/746) of the unannotated BCs are associated with at least one of the gene mutations.  
576 Interestingly, among the BCs that are associated with at least one gene mutation, a large  
577 proportion of the mutations happen in genes including TMEM132D, BCL9L, NF-1, SCN10A,  
578 PCDHA10, DIP2C, GLI3, TET2, and ARFGEF2, while only a small number fall into key  
579 CRC associated gene including APC, TP53, KRAS, CTNNB1, and PIK3CA. The mutation  
580 associated BCs majorly enrich pathways of nucleotide and glucose metabolism and immune  
581 responses. Detailed pathway enrichment of each gene mutation associated BCs is given  
582 through GitHub and described in Supplementary Table 2.

583

## 584 **DISCUSSIONS**

585 Disease subtype and drug therapy specific prognostic markers can offer valuable guidance in  
586 precision medicine. High throughput transcriptomics data of large cohort studies enables  
587 comprehensive identifications of prognostic markers on whole genome level. However, with  
588 patient specific features such as disease subtypes, drug treatment or other clinicopathological  
589 features, a limited number of samples is often stratified into even finer classes wherein each  
590 has a small number of samples. In such case, the statistical power on each stratified class of  
591 samples is largely reduced. Moreover, even though CMS and other cancer subtyping methods  
592 have used highly cancer relevant features, when looking at a particular drug response or  
593 prognosis, multiple alternative alterations may exist in specific but unknown subset of  
594 samples, which may or may not overlap with a certain stratification. In addition, multiple  
595 genes may interactively contribute to one response mechanism, which is especially the case in  
596 terms of drug resistance markers, as alterations in multiple pathways are always employed in  
597 one off-target resistance mechanism (36-38). How alternative drug resistance mechanisms  
598 (and their combinations) are correlated with disease subtypes or other clinicopathological  
599 features is largely undiscovered. Limiting our analysis into a pre-defining cancer subtyping or  
600 signature pathways would be a potential hurdle that could not only be misleading, but also  
601 severely harm the statistical power.

602

603 Our unsupervised bi-clustering based approach have the following advantages in identifying  
604 alternative disease subtypes/ drug therapy specific prognostic gene markers: (1) efficiently  
605 control false discoveries; (2) readily detect informative co-expressed prognostic markers; (3)  
606 conveniently handle the intricate relationships among different subtypes, and their  
607 interactions with various clinical outcomes. Of note, deriving prognostic or predictive  
608 markers from BCs with high statistical significance could not only decrease the number of  
609 independent tests but also limiting markers to co-expression gene modules, the expression  
610 level of which are more relevant in the disease context. The sample compositions in each BC  
611 provides an easily comprehensible way to understand the underlying subtypes, as well as the  
612 functional modules being executed in the BC. Our analysis has clearly demonstrated that  
613 bi-clustering based approach can effectively identify biomarkers for alternative prognosis  
614 related or drug resistance mechanisms from large scale transcriptomics data. We posit that  
615 bi-clustering is more sensitive to locate the biomarkers specific to small subset of samples and

616 the inference on the multiple genes in the BC can be provide more biologically coherent  
617 interpretations.

618

619 Nonetheless, we have seen a few more challenges that remain to be solved beyond this study:  
620 (1) most of current bi-clustering methods tend to exclude the highly overlapping BCs, which  
621 may be problematic when consistency of BCs across different datasets are to be performed.  
622 This raises a demand for effective identification of bi-clusters with high consistency through  
623 different data sets; (2) our current analysis pipeline lacks a predicative model using BCs,  
624 which largely limits its potential of practice. A possible solution is to incorporate the  
625 bi-clusters with a binary matrix factorization formulation, i.e. treating each BC as a column  
626 basis of the discretized data matrix, and the predictive model could be built between an  
627 outcome variable and the sets of explanatory variables consisting of the loadings of all the BC  
628 bases; (3) it is noteworthy some genes within a prognosis or drug resistance predictive BC are  
629 only selected because they are co-expressed (or co-regulated) with the true prognosis or drug  
630 resistance associated genes, and the third challenge remains to identify the genes that truly  
631 contribute to the poor prognosis or drug resistance that can become possible drug targets; and  
632 (4) the BC's statistical significance is estimated by an estimation formula for the upper bound  
633 of  $p$  value. The current method works well for the BCs with small number of 0s, but an  
634 improvement is need for the BCs with low consistency. We fully anticipate these challenges  
635 can be solved in future studies to increase the feasibility of BC based biomarker study.

636

637 Overall, our analysis generated a comprehensive annotation of BC based co-expression  
638 modules in CRC that offers novel biological characterizations for CMS classification and  
639 brings new insight of disease subtype and drug therapy specific prognosis predictive markers.  
640 The analysis procedures including bi-clustering formulation, identification, significance  
641 assessment and parameter settings are provided through <https://github.com/changwn/BC-CRC>,  
642 that can be more generally applied in precision medicine study of other disease types.

643

## 644 **METHODS**

### 645 *Data collection*

646 We have collected transcriptomics data of 1,440 colorectal cancer tissue samples including  
647 the one RNA-Seq data from TCGA and seven microarray data sets from GEO database. The  
648 micro-array datasets are selected with the following criteria: (1) data are collected by the top  
649 10 most frequently utilized human microarray platforms in GEO database; (2) dataset has  
650 more than 50 samples; and (3) dataset also provide certain prognostic or clinical outcome  
651 information. We use RPKM normalized expression value for RNA-Seq data and RMA  
652 normalized expression for microarray data. Detailed data information is provided in Table 2.

653 The DFS used in this study is defined as starting at primary treatment and stopping at disease  
654 relapse or death. Expression of each gene with multiple probes is assessed by expression of  
655 the probe with highest mean expression value in each data set. Genes of mean expressions at  
656 bottom 30% quantile in each microarray data set, and genes with 0 expression in more than 85%  
657 samples in the RNA-Seq data set are removed from the analysis, in order to control the noise  
658 of non- or lowly- expressed genes.

659

660 Table 2. Data information of the analyzed data.

661

| Data ID          | Sample# | Follow-up | Platform                 | Normalization |
|------------------|---------|-----------|--------------------------|---------------|
| <b>GSE14333</b>  | 290     | DFS       | Affymetrix U133 Plus 2.0 | RMA           |
| <b>GSE17536</b>  | 177     | OS/DFS    | Affymetrix U133 Plus 2.0 | RMA           |
| <b>GSE29621</b>  | 65      | OS/DFS    | Affymetrix U133 Plus 2.0 | RMA           |
| <b>GSE33113</b>  | 90      | DFS       | Affymetrix U133 Plus 2.0 | RMA           |
| <b>GSE37892</b>  | 130     | DFS       | Affymetrix U133 Plus 2.0 | RMA           |
| <b>GSE38832</b>  | 122     | OS/DFS    | Affymetrix U133 Plus 2.0 | RMA           |
| <b>GSE39582</b>  | 566     | OS/DFS    | Affymetrix U133 Plus 2.0 | RMA           |
| <b>TCGA-COAD</b> | 385     | OS        | RNA-Seq                  | RPKM          |

662

663 *Colon cancer consensus molecular subtype prediction*

664 We applied the R package CMSclassifier to predict the CMS classification of each sample in  
665 the eight data sets (39), by which each sample will be predicted with four CMS scores  
666 representing its similarity to the four CMS classes. One sample is classified to one subtype if  
667 its CMS score of the subtype is larger than 0.5 and a sample is considered as with  
668 multiple-classification if both top two CMS scores are larger than 0.5 and the difference  
669 between the two scores is smaller than 0.1.

670

671 *Modeling the regulatory states of gene expressions via data discretization*

672 To capture the regulatory states of a gene, we re-format the original expression data matrix  
673 into a larger binary matrix. Specifically, for a gene expression data  $X_{m \times n}$  with  $m$  genes and  $n$   
674 samples, we first generate a  $K \times n$  binary matrix  $Y_g$  for each gene  $g$ .  $Y_g[i, j] = 1$  if and  
675 only if  $X[g, j]$  is in the  $i$ th quantile of  $X[g, \cdot]$ ,  $i = 1, \dots, K$ . Hence each row of  $Y_g$  indicates  
676 the samples with certain expression patterns of  $g$ . Then we merge all the  $Y_g$  to form a  
677  $Km \times n$  binary matrix  $Y_{Km \times n}$  and apply our in-house bi-clustering software QUBIC-R to  
678 identify the bi-clusters enriched by 1s in  $Y_{Km \times n}$ .

679

680 The rationality of this formulation is that each of the bi-cluster identified here corresponds to  
681 a group of genes, the expression levels of each of which, are highly consistent over a subset of  
682 samples, hence representing a gene co-expression module specific to the subset of samples. It  
683 is worth noting that samples in one bi-cluster are highly likely to share similar transcriptional  
684 regulatory signals controlling the relevant genes. More discussion about the connection  
685 between bi-clusters and gene expression control are available in Supplementary Method.

686

687 To select a proper  $K$ , we have generated binary matrices for each data set by using  $K=2, 3, 4,$   
688 and  $5$  and examined the rate of the bi-clusters that are significantly associated with (1)  
689 biological pathways, (2) clinical features, and (3) CMS classification, among all the  
690 significant bi-clusters identified in each binary matrix. On average, highest rates of significant  
691 BCs are achieved when  $K=3$  throughout all the eight data sets (See more details in  
692 Supplementary Figure S1).

693

694 *Bi-clustering analysis of binary matrices*

695 We applied our recently released bi-clustering R package – QUBIC-R to identify bi-clusters  
 696 in discretized matrices. It is noteworthy that the number of rows ranges from 28,754 to 71,940  
 697 in this analysis. To the best of our knowledge, QUBIC R package is the most efficient  
 698 bi-clustering software in the public domain that can handle input data of such large scale. The  
 699 three parameters are set as follow: consistency level  $c=0.25$ , desired output number  $o=3000$ ,  
 700 and bicluster overlapping rate  $f$  is set at five different levels, 0.85, 0.875, 0.9, 0.95, and 1,  
 701 depending on the input data size and number of 1s in each row. Detailed information for  
 702 bi-clustering parameters determination and program running for each dataset are available in  
 703 Supplementary Method.

704

705 By extending Xing Sun *et al.*'s work (40-42), we derived an analytical formula to estimate the  
 706 upper bound of significance values for the BCs. Suppose in a random binary matrix  $M$  with  
 707  $m_0$  rows and  $n_0$  columns, its probability of 1 for any element, namely,  $p(M[i, j] = 1)$ , is  
 708 denoted as  $p_0$ . Then the upper bound of the probability that at least one submatrix  $M_1$  exists  
 709 in  $M$  could be assessed by the following formula, where  $M_1$  has  $m_1$  rows,  $n_1$  columns  
 710  $z_0$  total number of 0, and  $n_1 \geq K$ :

$$711 \quad P(\exists M_1 \text{ with } n_1 \geq K) \leq \binom{\beta n_1^2}{z_0} n_0^{-(\beta+1)(K-s(n_1, n_0, \beta))} (\log_b n_0)^{\beta+1}, \text{ when } n \rightarrow \infty,$$

712 where

$$713 \quad \alpha = \frac{m_0}{n_0}, \beta = \frac{m_1}{n_1}, b = \frac{1}{p_0}$$

$$714 \quad p_0 = P(M[i, j] = 1) = 1 - P(M[i, j] = 0) \text{ for } \forall i, j$$

$$715 \quad s(n_1, n_0, \beta) = \frac{\beta + 1}{\beta} \log_b n_0 - \frac{\beta + 1}{\beta} \log_b \left( \frac{\beta + 1}{\beta} \log_b n_0 \right) + \log_b \alpha$$

$$716 \quad + \frac{(1 + \beta) \log_b e - \beta \log_b \beta}{\beta}$$

717

718 More details of the derivation of this estimation formula is given in Supplementary Method.  
 719 We have tested this significance estimation method on simulated data and compared its  
 720 performance with the Chernoff's bound method (43), which is a popular measure for the  
 721 effectiveness of biclustering methods. In detail, we conducted bi-clustering analysis by using  
 722 same parameters on randomly generated gene expression matrices with same sizes.  
 723 Significance values for the identified BCs are evaluated using both two methods and are  
 724 compared with empirical  $p$  values. The analysis revealed that  $p$  values generated by our  
 725 methods can more accurately recover the empirical  $p$  values comparing to the Chernoff's  
 726 bound method. Particularly, our method offers a good control of false discover rate for the  
 727 BCs that are highly enriched by 1s, hence it is more robust in picking out the significant ones  
 728 from a large number of BCs identified in a large matrix. This is particularly key to large-scale  
 729 matrix.

730

### 731 *Annotations of the biological and clinical characteristics for each bi-cluster*

732 Biological characteristics of each BC is assessed by whether genes in the BC significantly  
 733 enrich a biology pathways or gene set. The enrichment analysis is computed by  
 734 hypergeometric test, and in total, 1329 canonical gene sets including KEGG, BIOCARTA,

735 REACTOME pathways and 1472 GO terms from MsigDB are used in the study. Here  
736  $p=0.005$  is used as the cutoff for significance.

737

738 Association analysis of each BC with clinical features were conducted using different tests  
739 based on the nature of the feature. For discrete clinical features including CMS classifications  
740 and pathological stages, we utilized fisher exact test; for continuous clinical features except  
741 for survival outcome, we compared the feature value for samples in and out of the BC by  
742 Mann Whitney test.  $p<0.005$  is used as significance cutoff for all these tests. Notably,  
743 associations with CMS are conducted for only BCs containing more than five samples of the  
744 CMS class. For survival outcomes including DFS and OS, we compared the survival for  
745 samples in and out of the BC, using log-rank test with significance cutoff  $p<0.05$ .

746

#### 747 *Analysis of somatic mutations in TCGA data*

748 TCGA COAD level 2 mutation profile of 429 samples predicted by *mutect* is retrieved from  
749 GDC database. A total of 932 genes with mutations in more than 5% (22/429) samples are  
750 selected. Considering high MSI causes the CRC genomes to be hyper-mutated, we exclude a  
751 majority of the 932 genes whose mutations are highly associated with MSI, and 73 gene  
752 mutations not associated with MSI are retained for further analysis. The association of a  
753 gene's mutation and MSI is calculated as the association between gene mutation and CMS  
754 class I—the class known to have high MSI, using Chi-square test ( $p<0.1$ ).

755

#### 756 *Multiple variable cox-regression model with variable selections*

757 In order to identify the BCs that could best predict prognosis, we constructed multiple  
758 variable Cox-regression model between patients' survival and the BCs shown to be associated  
759 with survival with a variable selection procedure. Here, each BC is coded into one binary  
760 explanatory vector with 1's for samples in the BC and 0's for samples not in the BC.  
761 Specifically, we applied forward and backward stepwise variable selection approach to select  
762 the model with lowest AIC value by using SURVIVAL and MASS package R..

763

#### 764 *Agglomerative clustering and stepwise log-rank test based approach for identification of 765 alternative drug resistance associated BC groups*

766 Among the BCs that are detected to show resistance to the chemo-drugs, we posit that each  
767 BC suggests one mechanism for the drug resistance. However, there may exist more than one  
768 BC corresponding to the same mechanism. In order to identify the most unique set of  
769 resistance mechanisms, we incorporated a log-rank test coupled with agglomerative clustering  
770 to cluster the BCs of similar resistance mechanisms into groups, each of which is linked with  
771 one drug resistance.

772

773 To do this, we first defined the distance between any two BCs as  $D(BC_i, BC_j) = 1 -$   
774  $\frac{|(\text{Samples in } BC_i) \cap (\text{Samples in } BC_j)|}{|(\text{Samples in } BC_i) \cup (\text{Samples in } BC_j)|}$ , based on which an agglomerative clustering was performed.

775 In each step of the clustering, two clusters  $X$  and  $Y$  are merged, if (1) samples in  $X \cap Y$  is  
776 significantly associated with resistance to the drug, (2) neither samples in  $X \setminus Y$  or  $Y \setminus X$  is  
777 significantly associated with the drug resistance. A sample collection is defined as associated

778 with resistance of a chemo-drug if the following two conditions are both met: (1) among drug  
779 treated samples, the overall survival of samples in the collection is significantly worse than  
780 those not in the collection ( $p < 0.001$ ); and (2) among samples in the collection, the overall  
781 survival of samples that are drug treated is significantly worse than those not treated ( $p < 0.05$ ).  
782 The agglomeration is stopped when no clusters could be merged.  
783



784 **REFERENCES**

785

- 786 1. Siegel RL, Miller KD, & Jemal A (2018) Cancer statistics, 2018. *CA Cancer J Clin*  
787 68(1):7-30.
- 788 2. Wolf AMD, *et al.* (2018) Colorectal cancer screening for average-risk adults: 2018  
789 guideline update from the American Cancer Society. *CA Cancer J Clin*  
790 68(4):250-281.
- 791 3. Inamura K (2018) Colorectal Cancers: An Update on Their Molecular Pathology.  
792 *Cancers (Basel)* 10(1).
- 793 4. Guinney J, *et al.* (2015) The consensus molecular subtypes of colorectal cancer. *Nat*  
794 *Med* 21(11):1350-1356.
- 795 5. Cancer Genome Atlas N (2012) Comprehensive molecular characterization of human  
796 colon and rectal cancer. *Nature* 487(7407):330-337.
- 797 6. Roepman P, *et al.* (2014) Colorectal cancer intrinsic subtypes predict chemotherapy  
798 benefit, deficient mismatch repair and epithelial-to-mesenchymal transition. *Int J*  
799 *Cancer* 134(3):552-562.
- 800 7. Budinska E, *et al.* (2013) Gene expression patterns unveil a new level of molecular  
801 heterogeneity in colorectal cancer. *J Pathol* 231(1):63-76.
- 802 8. Schlicker A, *et al.* (2012) Subtypes of primary colorectal tumors correlate with  
803 response to targeted treatment in colorectal cell lines. *BMC Med Genomics* 5:66.
- 804 9. Sadanandam A, *et al.* (2013) A colorectal cancer classification system that associates  
805 cellular phenotype and responses to therapy. *Nat Med* 19(5):619-625.
- 806 10. De Sousa EMF, *et al.* (2013) Poor-prognosis colon cancer is defined by a molecularly  
807 distinct subtype and develops from serrated precursor lesions. *Nat Med*  
808 19(5):614-618.
- 809 11. Marisa L, *et al.* (2013) Gene expression classification of colon cancer into molecular  
810 subtypes: characterization, validation, and prognostic value. *PLoS Med*  
811 10(5):e1001453.
- 812 12. Perez-Villamil B, *et al.* (2012) Colon cancer molecular subtypes identified by  
813 expression profiling and associated to stroma, mucinous type and different clinical  
814 behavior. *BMC Cancer* 12:260.
- 815 13. Pontes B, Giraldez R, & Aguilar-Ruiz JS (2015) Biclustering on expression data: A  
816 review. *J Biomed Inform* 57:163-180.
- 817 14. Eren K, Deveci M, Kucuktunc O, & Catalyurek UV (2013) A comparative analysis of  
818 biclustering algorithms for gene expression data. *Brief Bioinform* 14(3):279-292.
- 819 15. Zhang Y, *et al.* (2017) QUBIC: a bioconductor package for qualitative biclustering  
820 analysis of gene co-expression data. *Bioinformatics* 33(3):450-452.
- 821 16. Li G, Ma Q, Tang H, Paterson AH, & Xu Y (2009) QUBIC: a qualitative biclustering  
822 algorithm for analyses of gene expression data. *Nucleic Acids Res* 37(15):e101.
- 823 17. Xie J, Ma A, Fennell A, Ma Q, & Zhao J (2018) It is time to apply biclustering: a  
824 comprehensive review of biclustering applications in biological and biomedical data.  
825 *Brief Bioinform*.
- 826 18. Subramanian A, *et al.* (2005) Gene set enrichment analysis: a knowledge-based  
827 approach for interpreting genome-wide expression profiles. *Proc Natl Acad Sci U S A*

- 828 102(43):15545-15550.
- 829 19. Zhang C, Cao S, & Xu Y (2014) Population dynamics inside cancer biomass driven  
830 by repeated hypoxia-reoxygenation cycles. *Quantitative Biology* 2(3):85-99.
- 831 20. DeVita VT, Jr. & Chu E (2008) A history of cancer chemotherapy. *Cancer Res*  
832 68(21):8643-8653.
- 833 21. Abdullah LN & Chow EK (2013) Mechanisms of chemoresistance in cancer stem  
834 cells. *Clin Transl Med* 2(1):3.
- 835 22. Zheng HC (2017) The molecular mechanisms of chemoresistance in cancers.  
836 *Oncotarget* 8(35):59950-59964.
- 837 23. Gustavsson B, *et al.* (2015) A review of the evolution of systemic chemotherapy in  
838 the management of colorectal cancer. *Clin Colorectal Cancer* 14(1):1-10.
- 839 24. Fraser M, *et al.* (2003) Chemoresistance in human ovarian cancer: the role of  
840 apoptotic regulators. *Reprod Biol Endocrinol* 1:66.
- 841 25. Weaver DA, *et al.* (2005) ABCC5, ERCC2, XPA and XRCC1 transcript abundance  
842 levels correlate with cisplatin chemoresistance in non-small cell lung cancer cell lines.  
843 *Mol Cancer* 4(1):18.
- 844 26. Mochmann LH, *et al.* (2014) ERG induces a mesenchymal-like state associated with  
845 chemoresistance in leukemia cells. *Oncotarget* 5(2):351-362.
- 846 27. Zhang L, *et al.* (2017) Clk1-regulated aerobic glycolysis is involved in glioma  
847 chemoresistance. *J Neurochem* 142(4):574-588.
- 848 28. Cheng S, *et al.* (2017) GNB2L1 and its O-GlcNAcylation regulates metastasis via  
849 modulating epithelial-mesenchymal transition in the chemoresistance of gastric  
850 cancer. *PLoS One* 12(8):e0182696.
- 851 29. Park J, Park SY, & Kim JH (2016) Leukotriene B4 receptor-2 contributes to  
852 chemoresistance of SK-OV-3 ovarian cancer cells through activation of signal  
853 transducer and activator of transcription-3-linked cascade. *Biochim Biophys Acta*  
854 1863(2):236-243.
- 855 30. Tanaka N, *et al.* (2018) Single-cell RNA-seq analysis reveals the platinum resistance  
856 gene COX7B and the surrogate marker CD63. *Cancer Med* 7(12):6193-6204.
- 857 31. Kim M, *et al.* (2017) GFRA1 promotes cisplatin-induced chemoresistance in  
858 osteosarcoma by inducing autophagy. *Autophagy* 13(1):149-168.
- 859 32. Uckun FM, *et al.* (2011) Inducing apoptosis in chemotherapy-resistant B-lineage  
860 acute lymphoblastic leukaemia cells by targeting HSPA5, a master regulator of the  
861 anti-apoptotic unfolded protein response signalling network. *Br J Haematol*  
862 153(6):741-752.
- 863 33. Tsai YJ, *et al.* (2016) Adjuvant FOLFOX treatment for stage III colon cancer: how  
864 many cycles are enough? *Springerplus* 5(1):1318.
- 865 34. Rees MG, *et al.* (2016) Correlating chemical sensitivity and basal gene expression  
866 reveals mechanism of action. *Nat Chem Biol* 12(2):109-116.
- 867 35. Bracht K, Nicholls AM, Liu Y, & Bodmer WF (2010) 5-Fluorouracil response in a  
868 large panel of colorectal cancer cell lines is associated with mismatch repair  
869 deficiency. *Br J Cancer* 103(3):340-346.
- 870 36. Chang RL, Xie L, Xie L, Bourne PE, & Palsson BO (2010) Drug off-target effects  
871 predicted using structural analysis in the context of a metabolic network model. *PLoS*

- 872            *Comput Biol* 6(9):e1000938.
- 873    37.    Schenone M, Dancik V, Wagner BK, & Clemons PA (2013) Target identification and  
874            mechanism of action in chemical biology and drug discovery. *Nat Chem Biol*  
875            9(4):232-240.
- 876    38.    Mansoori B, Mohammadi A, Davudian S, Shirjang S, & Baradaran B (2017) The  
877            Different Mechanisms of Cancer Drug Resistance: A Brief Review. *Adv Pharm Bull*  
878            7(3):339-348.
- 879    39.    Eide PW, Bruun J, Lothe RA, & Sveen A (2017) CMScaller: an R package for  
880            consensus molecular subtyping of colorectal cancer pre-clinical models. *Sci Rep*  
881            7(1):16618.
- 882    40.    Sun X (2007) *Significance and recovery of blocks structures in binary and*  
883            *real-valued matrices with noise* (The University of North Carolina at Chapel Hill).
- 884    41.    Sun X & Nobel A (2006) Significance and recovery of block structures in binary  
885            matrices with noise. *International Conference on Computational Learning Theory*,  
886            (Springer), pp 109-122.
- 887    42.    Sun X & Nobel AB (2008) On the size and recovery of submatrices of ones in a  
888            random binary matrix. *Journal of Machine Learning Research* 9(Nov):2431-2453.
- 889    43.    Hoeffding W (1963) Probability Inequalities for Sums of Bounded Random Variables.  
890            *Journal of the American Statistical Association* 58(301):13-30.
- 891
